# Supplementary material
Source: MDPI journal article supplement (https://www.mdpi.com/2220-9964/6/10/306)
Supplement: s1 [file s1]

## Supplementary Material: Terminology and Abbreviation

For the purposes of this paper, the following terms and definitions apply. For more details on the definitions specified in this paper, please refer to OGC® CDB Core Standard: CDB Terms and Definitions at [https://portal.opengeospatial.org/files/?artifact\\_id=72714](https://portal.opengeospatial.org/files/?artifact_id=72714).

| Term       | Definition                                                                                                                                                                                                          |
|------------|---------------------------------------------------------------------------------------------------------------------------------------------------------------------------------------------------------------------|
| 3D         | Three Dimensional                                                                                                                                                                                                   |
| API        | Application Program Interface                                                                                                                                                                                       |
| Esri       | Environmental Systems Research Institute                                                                                                                                                                            |
| CDB        | Common Database (OGC standard)                                                                                                                                                                                      |
| City GML   | CityGML is an open standardised data model and exchange format to store digital 3D models of cities and landscapes. For more information please see <a href="https://www.citygml.org/">https://www.citygml.org/</a> |
| DGIWG      | Defense Geographic Information Working Group                                                                                                                                                                        |
| DGGS       | Discrete Global Grid System: spatial reference system that uses a hierarchical tessellation of cells to partition and address the globe. “cell” aka “tile” or “geocell”                                             |
| DIGEST     | The Digital Geographic Information Exchange Standard                                                                                                                                                                |
| DIS        | Distributed Interactive Simulations [IEEE Std 1278TM]                                                                                                                                                               |
| FDD        | Feature Data Dictionary. A Feature data dictionary is a collection of descriptions of the Feature objects or items in a Feature data model for the benefit of programmers and others who need to refer to them.     |
| Feature    | Abstraction of real world phenomena NOTE A feature may occur as a type or an instance. Feature type or feature instance is used when only one is meant. [adapted from ISO 19101]                                    |
| FSC        | Feature Sub-Code                                                                                                                                                                                                    |
| Geopackage | An OGC GeoPackage (GPKG) is an open, non-proprietary, platform-independent and standards-based data format for geographic information system implemented as a SQLite database container.(OGC standard)              |
| GIS        | Geographic Information System                                                                                                                                                                                       |
| GML        | Geography Markup Language (OGC/ISO standard)                                                                                                                                                                        |
| GSMoel     | A Geospecific model is instanced once and only once within a CDB. Geospecific models usually correspond to unique (in either shape, size, texture, materials or attribution), man-made, real world 3D features.     |

---

|            |                                                                                                                                                                                                                                                                                                                                                                                                                    |
|------------|--------------------------------------------------------------------------------------------------------------------------------------------------------------------------------------------------------------------------------------------------------------------------------------------------------------------------------------------------------------------------------------------------------------------|
| GTModel    | Geotypical model is instanced multiple times within a CDB data store. Geotypical models correspond to representative (in shape, size, texture, materials and attribution) models of real-world manmade or natural 3D features.                                                                                                                                                                                     |
| HLA        | High-Level Architecture Standard [IEEE Std 1516TM]                                                                                                                                                                                                                                                                                                                                                                 |
| ISO        | International Standardisation Organisation                                                                                                                                                                                                                                                                                                                                                                         |
| ISO/IEC    | It is a joint technical committee of the International Organization for Standardization (ISO) and the International Electrotechnical Commission (IEC).                                                                                                                                                                                                                                                             |
| IT         | Information Technology                                                                                                                                                                                                                                                                                                                                                                                             |
| JPEG       | Joint Photographic Experts Group; JPEG: The informal name of the committee which created this Specification. It is a commonly used method of compression for digital images. The degree of compression can be adjusted, allowing a selectable trade-off between storage size and image quality. Please see <a href="https://www.w3.org/Graphics/JPEG/itu-t81.pdf">https://www.w3.org/Graphics/JPEG/itu-t81.pdf</a> |
| JT         | Joint Training                                                                                                                                                                                                                                                                                                                                                                                                     |
| LoD        | Level of Details. Representations of the same thing that differ only in the amount of fidelity. An LOD is said to be coarse if it contains little detail or fine if it contains considerable detail.                                                                                                                                                                                                               |
| M&S        | Modeling and Simulation                                                                                                                                                                                                                                                                                                                                                                                            |
| MModel     | Moving 3D models such as vehicles                                                                                                                                                                                                                                                                                                                                                                                  |
| NAS        | NSG Application Schema                                                                                                                                                                                                                                                                                                                                                                                             |
| NATO       | North Atlantic Treaty Organization                                                                                                                                                                                                                                                                                                                                                                                 |
| NGA        | National Geospatial-Intelligence Agency                                                                                                                                                                                                                                                                                                                                                                            |
| NSG        | National System for Geospatial-Intelligence                                                                                                                                                                                                                                                                                                                                                                        |
| OGC        | Open Geospatial Consortium, Inc.                                                                                                                                                                                                                                                                                                                                                                                   |
| OpenFlight | OpenFlight (or .flt) is a 3D geometry model file format designed as a non-proprietary format for use by real-time 3D visual simulation image generators. Please see <a href="http://www.presagis.com/products_services/standards/openflight">http://www.presagis.com/products_services/standards/openflight</a>                                                                                                    |
| PEO STRI   | U.S. Army Program Executive Office for Simulation Training and Instrumentation                                                                                                                                                                                                                                                                                                                                     |
| RGB        | RGB is a file extension for an image file created on a Silicon Graphics workstation. RGB files can contain Run Length Encoding (RLE) compressed or uncompressed images in grayscale or color, and also supports optional transparency.                                                                                                                                                                             |
| SE         | Synthetic Environment                                                                                                                                                                                                                                                                                                                                                                                              |
| SEDRIS     | Synthetic Environment Data Representation and Interchange Specification                                                                                                                                                                                                                                                                                                                                            |

---

---

|           |                                                                                                                                                                                                                                                                                                                                                                                                                                         |
|-----------|-----------------------------------------------------------------------------------------------------------------------------------------------------------------------------------------------------------------------------------------------------------------------------------------------------------------------------------------------------------------------------------------------------------------------------------------|
| Shapefile | The shapefile format is a popular geospatial vector data format for geographic information system (GIS) software. It is developed and regulated by Esri as a (mostly) open specification for data interoperability among Esri and other GIS software products.                                                                                                                                                                          |
| SOS       | Sensor Observation Service (OGC standard)                                                                                                                                                                                                                                                                                                                                                                                               |
| SWG       | Standard Working Group                                                                                                                                                                                                                                                                                                                                                                                                                  |
| SE        | Synthetic Environment                                                                                                                                                                                                                                                                                                                                                                                                                   |
| GeoTIFF   | Geo Tagged Image File Format. GeoTIFF is a public domain metadata standard which allows geo-referencing information to be embedded within a TIFF file. The potential additional information includes map projection, coordinate systems, ellipsoids, datum, and everything else necessary to establish the exact spatial reference for the file. Please see <a href="http://trac.osgeo.org/geotiff/">http://trac.osgeo.org/geotiff/</a> |
| UAV       | Unmanned Aerial Vehicle                                                                                                                                                                                                                                                                                                                                                                                                                 |
| UHRB      | Ultra-High Resolution Building                                                                                                                                                                                                                                                                                                                                                                                                          |
| UML       | Unified Modeling Language (OMG standard)                                                                                                                                                                                                                                                                                                                                                                                                |
| USSOCOM   | US Special Operations Command                                                                                                                                                                                                                                                                                                                                                                                                           |
| WCS       | Web Coverage Service (OGC standard)                                                                                                                                                                                                                                                                                                                                                                                                     |
| WFS       | Web Feature Service (OGC standard)                                                                                                                                                                                                                                                                                                                                                                                                      |
| WGS-84    | WGS 84 is the standard U.S. Department of Defense definition of a global reference system for geospatial information and is the reference system for the Global Positioning System (GPS).                                                                                                                                                                                                                                               |
| WMS       | Web Map Service (OGC standard)                                                                                                                                                                                                                                                                                                                                                                                                          |
| XML       | Extensible Markup Language (W3C standard) In computing, Extensible Markup Language (XML) is a markup language that defines a set of rules for encoding documents in a format that is both human-readable and machine-readable. Please see <a href="https://www.w3.org/TR/REC-xml/">https://www.w3.org/TR/REC-xml/</a>                                                                                                                   |

---
